# Supplementary material for: Cranberry Proanthocyanidins and Dietary Oligosaccharides Synergistically Modulate Lactobacillus plantarum Physiology
Source: Microorganisms. 2021 Mar 22;9(3):656. doi: 10.3390/microorganisms9030656 (PMC8004764; doi:10.3390/microorganisms9030656)
Supplement: Supplementary file 1 [file microorganisms-09-00656-s001.zip › microorganisms-1129408.xlsx]

## Sheet: Table S1
Table S1 Composition of cranberry PAC extracts (Ocean Spray, personal communication)
Test	Unit	120814 (PAC1)	8498 (PAC2)	Note
Total Organic Acid	%	ND	2.9
Total Sugar	%	2	7
Total Phenolic acid	mg/kg	2500	134600	HPLC method
Total flavonol	mg/kg	59200	60300	HPLC method
PACs-BL DMAC	mg/kg	194000	190500	with A2 Dimer as standard
PACs -OSC DMAC*	mg/kg	832000	535000	Ocean Spray internal method
Total Anthocyanin	mg/kg	1300	16300	HPLC method
* use PAC from whole fruit as standard (Krueger et al 2016)

## Sheet: Table S2
Table S2 MS/MS conditions for phenolic metabolite detection (1)
Compound	Retention time (min)	[M-H]- (m/z)	m/z	Cone voltage	Collision Energy (V)
Pyrogallol	1.1	125	79	36	16
Protocatechuic acid	1.8	153	109	30	12
Catechol/pyrocatechol	2.6	109	81	44	14
3,4-dihydroxyphenylacetic acid	2.7	167	123	20	12
4-hydroxyphenylacetic acid	4.3	151	107	24	6
3-(3,4-dihydroxyphenyl)-propionic acid	4.4	181	137	32	12
3-hydroxybenzoic acid	4.5	137	93	30	18
3-hydroxyphenyl acetic acid	5	151	197	25	16
Syringic acid	5.7	197	182	30	12
3-(4-hydroxyphenyl)-propionic acid	6.3	165	121	33	12
p-coumaric acid	6.7	163	119	30	14
3-(3-hydroxyphenyl)-propionic acid	7.6	165	121	32	12
Epicatechin	6.31	289	245	34	16
Procyanidin A2	10.17	575	285	44	24
Procyanidin A2	10.17	575	449	44	20
Procyanidin B2	5.26	577	289	36	22
Procyanidin B2	5.26	577	425	36	12
1. Sánchez-Patán F, Monagas M, Moreno-Arribas MV, Bartolomé B. 2011. Determination of Microbial Phenolic Acids in Human Faeces by UPLC-ESI-TQ MS. J Agric Food Chem 59:2241–2247.

## Sheet: Table S3
Table S3 Growth kinetics of Lactobacillus plantarum ATCC BAA-793 with PACs calculated with growthcurvera
	OD600nm, asym	RATE
Glucose	1.21±0.03	0.74±0.03
Glucose+PAC1	1.48±0.02abc	0.44±0.00b
Glucose+PAC2	1.07±0.01ab	0.73±0.01b
FOS+PAC1	1.02±0.01bc	0.23±0.00bc
FOS+PAC2	0.25±0.04b	1.05±0.14b
HMO	0.34±0.01	0.51±0.01
HMO+PAC1	0.59±0.02abc	0.66±0.01b
HMO+PAC2	0.38±0.04b	0.70±0.07b
XG	0.27±0.02	1.12±0.11
XG+PAC1	0.48±0.04a	0.83±0.12b
XG+PAC2	0.50±0.06ab	0.55±0.10ab
PAC1 alone	0.40±0.02cd	1.78±0.18
PAC2 alone	0.11±0.01	1.99±0.25
a letters indicate significant differences observed between carbohydrates using one-way ANOVA and Tukey’s test (p<0.05).
a: different than corresponding carbon source
b: different than corresponding PAC alone
c: different between the two PACs within same carbon source
d: PACs alone different than negative control

## Sheet: Table S4
Table S4. Growth kinetics of other lactobacilli strains grown on carbohydrates with PACs calculated with growthcurvera
	Lactobacillus plantarum ATCC 14917		Lactobacillus johnsonii ATCC 33200		Lactobacillus pentosus B-227		Lactobacillus reuteri B-14171
	OD600nm	RATE	OD600nm	RATE	OD600nm	RATE	OD600nm	RATE
GLC	1.38±0.04	0.69±0.21	0.6±0.05	1.10±0.10	1.40±0.08	0.64±0.05	0.92±0.00	1.11±0.01
GLC+PAC1	1.43±0.2b	0.67±0.01	0.72±0.01ab	0.80±0.03	1.13±0.00ab	0.44±0.06	0.85±0.01	0.70±0.04
GLC+PAC2	1.29±0.01b	0.73±0.01	0.67±0.06b	1.11±0.16	1.32±0.03b	0.59±0.04	0.84±0.04	0.96±0.02
PAC1	0.16±0.02	1.62±0.13	0.27±0.03cd	0.15±0.01	0.31±0.04	1.27±0.30	ND	ND
PAC2	0.22±0.01	0.24±0.09	0.13±0.04cd	2.41±0.21	0.36±0.06	0.37±0.11	ND	ND
HMO	0.26±0.03	1.26±0.23	0.06±0.014	3.71±0.73	0.55±0.04	0.53±0.02	0.25±0.02	1.78±0.26
HMO+PAC1	0.28±0.02c	1.04±0.15	0.21±0.00a	0.26±0.01	0.63±0.09b	0.26±0.03	0.21±0.01	0.31±0.00
HMO+PAC2	0.49±0.04abc	1.25±0.21	0.22±0.02a	1.10±0.00	0.68±0.07b	0.41±0.03	0.29±0.08	2.08±1.08
XG	0.27±0.01	1.53±0.22	0.07±0.00	2.14±0.19	0.46±0.06	0.40±0.02	0.17±0.01	1.30±0.13
XG+PAC1	0.50±0.01ab	0.64±0.06	0.48±0.02abc	0.93±0.06	0.33±0.07	0.76±0.41	0.07±0.09	0.14±0.09
XG+PAC2	0.44±0.06b	1.09±0.23	0.17±0.02c	3.07±1.04	0.49±0.04b	0.63±0.16	0.40±0.10	0.96±0.45
NEG	0.33±0.23	ND	0.05±0.07	ND	0.29±0.12	ND	0.25±0.10	ND
aletters indicate significant differences observed between carbohydrates using one-way ANOVA and Tukey’s test (p<0.05).
a: different than corresponding carbon source
b: different than corresponding PAC alone
c: different between the two PACs within same carbon source
d: PACs alone different than negative control

## Sheet: Table S5
Table S5 Spontaneous degradation of phenolic compounds in the absence of Lactobacillus plantarum
	PACs in the absence of fermentable carbohydrates						Xyloglucans						Fructooligosaccharides						Human milk oligosaccharides
	PAC1 no bacteria(mM)	PAC1 Delta (mM)	% change	PAC2 no bacteria (mM)	PAC2 Delta (mM)	% change	PAC1 no bacteria (mM)	PAC1 Delta (mM)	% change	PAC2 no bacteria (mM)	PAC2 Delta (mM)	% change	PAC1 no bacteria(mM)	PAC1 Delta (mM)	% change	PAC2 no bacteria (mM)	PAC2 Delta (mM)	% change	PAC1 no bacteria (mM)	PAC1 Delta (mM)	% change	PAC2 no bacteria (mM)	PAC2 Delta (mM)	% change
Procyanidin A2	1.73	-6.87	-79.93	3.38	-2.63	-43.81	0.08	-4.3	-98.15	0.89	-5.94	-86.97	0	0	NA	0.08	0.04	98.61	7.11	1.21	20.44	6.59	-0.2	-2.91
Procyanidin B2	1.75	1.73	7700	3.88	-2.1	-35.17	0.03	-0.33	-92.38	0.13	-0.28	-68.84	0.06	0.04	128.21	0.05	-0.02	-34.19	0.01	0	-12.47	3	-3.99	-57.09
Epicatechin	0.25	-0.05	-16.42	0.78	-0.41	-34.53	0	-0.07	-100	0.04	-0.19	-82.05	0.07	0.02	41.25	0.2	0.03	20.41	0.21	-0.07	-24.92	0.72	-0.4	-35.83
3-(3,4-dihydroxyphenyl)propionic acid	0	0	NA	0	-0.09	-100	0	0	NA	0	-0.14	-100	0	-0.04	-100	0.04	0.04	NA	0	0	NA	0	0	NA
3-(4-hydroxyphenyl)propionic acid	0.16	0.16	NA	0	-0.2	-100	0	0	NA	1.51	-0.14	-8.49	0.1	0.1	NA	0.15	-0.05	NA	0.1	0.1	NA	0.18	-0.2	-52.7
3,4-dihydroxyphenylacetic acid	0.04	0.02	92.18	0.05	0.02	90.29	0	0	NA	0	0	NA	0	-0.03	-100	0.03	-0.01	-33.07	0	-0.03	-100	0.07	-0.01	-9.86
4-hydroxyphenylacetic acid	0.54	0.04	7.79	0.64	0.17	37.52	0	0	NA	0	0	NA	0.36	-0.01	-1.66	0.47	0.06	15.36	2.67	1	60.25	2.3	1.05	83.88
Protocatechuic acid	1.48	1.86	125.32	9.42	2.1	28.75	2.24	0.57	34.45	9.48	0.76	8.72	7.92	6.53	468.44	9.96	3.71	59.29	2.6	1.36	110.46	12.13	4.22	53.31
Catechol	0	0	NA	0	0	NA	0	-0.27	-100	0	0	NA	0	0	NA	0	0	NA	0	0	NA	0	0	NA
Syringic acid	0.16	0.06	61.72	0.24	0.22	1227	0.2	0.03	16.67	0.23	-0.1	-31.43	0.37	0.29	350.65	0.65	0.64	11778	0.2	0.16	404.66	0.17	0.14	413.02
p-coumaric acid	0.01	-0.01	-59.04	32.8	3.29	11.16	0.04	0	0	24.53	0.7	2.94	0.03	0.01	29.82	31.28	0.99	3.26	0.03	0.02	514.54	28.6	3.63	14.53

## Sheet: Table S6
Table S6 General RNA-seq transcriptome features
Sample	Number of pair reads*	% reads	% counts mapped to genes**	number of no feature reads	% counts unmapped to genes
		aligning to
		genome
GLC_1	4610719	98.79	91.8	618510	13.4
GLC_2	6046673	98.77	92.7	784998	13
PAC1_1	4312306	97.14	65.2	1467093	34
PAC1_2	3299987	96.42	63.8	1172518	35.5
PAC2_1	3294291	91.35	57.4	1162320	35.3
PAC2_2	3786346	96.68	62.8	1304444	34.5
FOSP1_1	7602493	97.51	61.4	2970356	39.1
FOSP1_2	6567568	98.18	49.6	3336610	50.8
FOSP2_1	4960384	96.85	60.2	1927346	38.9
FOSP2_2	3918060	82.17	58.6	1162548	29.7
HMO_1	7685679	97.25	52.1	3615100	47
HMO_2	7872811	98.8	53.3	3749319	47.6
HMOP1_1	7184963	98.65	62	2324487	32.4
HMOP1_2	6884937	98.87	74.6	1944554	28.2
HMOP2_1	7324148	97.32	75.6	1798634	24.6
HMOP2_2	7231338	98.8	74.3	1875646	25.9
XG_1	4220048	96.82	65.6	1425739	33.8
XG_2	4027883	82.13	58.7	1031785	25.6
XGP1_1	6645143	98.37	65.8	2392499	36
XGP1_2	8241678	96.99	57.3	3528596	42.8
XGP2_1	6912136	93.05	60	2453790	35.5
XGP2_2	6529778	96.83	61	2503777	38.3
*After 16S cleanup
**non-unique gene counts
